# Supplementary material for: ApoB/ApoA-I ratio is independently associated with carotid atherosclerosis in type 2 diabetes mellitus with well-controlled LDL cholesterol levels
Source: PubMed Central journal article supplement — Korean J Intern Med. 2017 Dec 28;33(1):138–47. doi: 10.3904/kjim.2017.396 (PMC5768554; doi:10.3904/kjim.2017.396), 2017-12-28
Supplement: kjim-2017-396-suppl1.pdf [file kjim-2017-396-suppl1.pdf]

**Supplementary Table 1. Univariate logistic regression analysis for the presence of carotid atherosclerosis**

| Variable                             | Odds ratio (95% CI) | p value |
|--------------------------------------|---------------------|---------|
| Age, yr                              | 1.09 (1.07–1.11)    | < 0.001 |
| Male sex                             | 1.39 (1.05–1.84)    | 0.021   |
| Body mass index, kg/m <sup>2</sup>   | 1.06 (1.01–1.11)    | 0.010   |
| SBP, mmHg                            | 1.02 (1.01–1.03)    | < 0.001 |
| DBP, mmHg                            | 1.00 (0.99–1.02)    | 0.628   |
| DM duration, yr                      | 1.06 (1.04–1.08)    | < 0.001 |
| Use of statins                       | 1.57 (1.11–2.21)    | 0.011   |
| Use of anti-hypertensive drugs (yes) | 1.58 (1.18–2.13)    | 0.002   |
| Use of insulin (yes)                 | 1.31 (0.85–2.01)    | 0.222   |
| Use of T <sup>2</sup> ZD (yes)       | 1.37 (0.89–2.11)    | 0.149   |
| HbA <sub>1c</sub> , %                | 1.07 (0.99–1.16)    | 0.108   |
| Fasting glucose, mg/dL               | 1.00 (0.99–1.00)    | 0.813   |
| Total cholesterol, mg/dL             | 1.00 (0.99–1.01)    | 0.188   |
| Triglycerides, mg/dL                 | 1.01 (1.00–1.04)    | 0.042   |
| HDL-C, mg/dL                         | 0.99 (0.98–0.99)    | 0.002   |
| Log-transformed LDL-C, mg/dL         | 7.71 (1.53–38.75)   | 0.013   |
| ApoB, mg/dL                          | 1.02 (1.01–1.02)    | < 0.001 |
| ApoA-I, mg/dL                        | 0.99 (0.98–0.99)    | 0.001   |
| ApoB/ApoA-I ratio                    | 9.51 (4.32–19.57)   | < 0.001 |
| C-peptide, ng/mL                     | 1.20 (1.02–1.42)    | 0.031   |
| <i>K<sub>itt</sub></i> , %/min       | 0.78 (0.68–0.90)    | 0.001   |

CI, confidence interval; SBP, systolic blood pressure; DBP, diastolic blood pressure; T<sup>2</sup>ZD, thiazolidinedione; HbA<sub>1c</sub>, glycated hemoglobin; HDL-C, high density lipoprotein cholesterol; LDL-C, low density lipoprotein cholesterol; Apo, apolipoprotein; *K<sub>itt</sub>*, rate constant for plasma glucose disappearance.
