# Supplementary material for: ApoB/ApoA-I ratio is independently associated with carotid atherosclerosis in type 2 diabetes mellitus with well-controlled LDL cholesterol levels
Source: PubMed Central journal article supplement — Korean J Intern Med. 2017 Dec 28;33(1):138–47. doi: 10.3904/kjim.2017.396 (PMC5768554; doi:10.3904/kjim.2017.396), 2017-12-28
Supplement: kjim-2017-396-suppl2.pdf [file kjim-2017-396-suppl2.pdf]

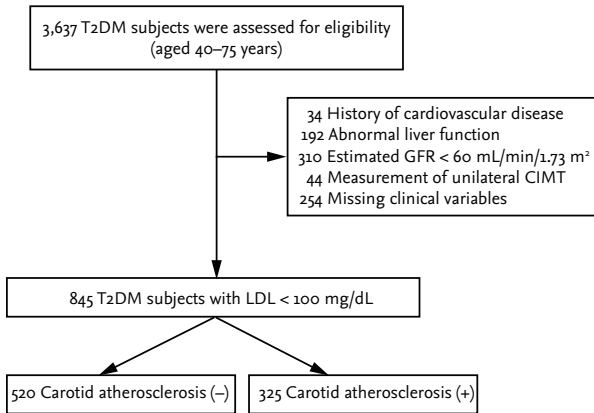

**Supplementary Figure 1.** Selection of study subjects. T2DM, type 2 diabetes mellitus; GFR, glomerular filtration rate; CIMT, carotid intima-media thickness; LDL, low density lipoprotein.
